# Supplementary material for: Revealing quantitative structure–activity relationships of transport properties in acene and acene derivative organic materials
Source: Royal Society of Chemistry journal article supplement (doi:10.1039/b923862j), 2010-01-01

**Electronic Supplementary Information (ESI) Available:**

Reference of Gaussian 03; QM Computed Mulliken Charge of Neutral and Cationic States of Eight Molecules in Scheme 1 (Figure S1); Computation details of cation internal reorganization energy  $\lambda$  (Table S1). HOMO and LUMO of the molecules in Scheme 1 (Figure S2).

# Revealing quantitative structure-activity relationships of transport properties in acene and acene derivative organic materials

*Shu-Hao Wen, Wei-Qiao Deng\*, and Ke-Li Han\**

State Key Laboratory of Molecular Reaction Dynamics, Dalian Institute of Chemical Physics, Chinese  
Academy of Sciences, Dalian, P.R. China 116023

Gaussian 03, Revision C.02:

M. J. Frisch, G. W. Trucks, H. B. Schlegel, G. E. Scuseria, M. A. Robb, J. R. Cheeseman, J. A. Montgomery, Jr., T. Vreven, K. N. Kudin, J. C. Burant, J. M. Millam, S. S. Iyengar, J. Tomasi, V. Barone, B. Mennucci, M. Cossi, G. Scalmani, N. Rega, G. A. Petersson, H. Nakatsuji, M. Hada, M. Ehara, K. Toyota, R. Fukuda, J. Hasegawa, M. Ishida, T. Nakajima, Y. Honda, O. Kitao, H. Nakai, M. Klene, X. Li, J. E. Knox, H. P. Hratchian, J. B. Cross, C. Adamo, J. Jaramillo, R. Gomperts, R. E. Stratmann, O. Yazyev, A. J. Austin, R. Cammi, C. Pomelli, J. W. Ochterski, P. Y. Ayala, K. Morokuma, G. A. Voth, P. Salvador, J. J. Dannenberg, V. G. Zakrzewski, S. Dapprich, A. D. Daniels, M. C. Strain, O. Farkas, D. K. Malick, A. D. Rabuck, K. Raghavachari, J. B. Foresman, J. V. Ortiz, Q. Cui, A. G. Baboul, S. Clifford, J. Cioslowski, B. B. Stefanov, G. Liu, A. Liashenko, P. Piskorz, I. Komaromi, R. L. Martin, D. J. Fox, T. Keith, M. A. Al-Laham, C. Y. Peng, A. Nanayakkara, M. Challacombe, P. M. W. Gill, B. Johnson, W. Chen, M. W. Wong, C. Gonzalez, and J. A. Pople, Gaussian, Inc., 2004.

**Fig. S1.** QM Computed Mulliken Charge of Neutral and Cationic States of Eight Molecules in Scheme

**1.**

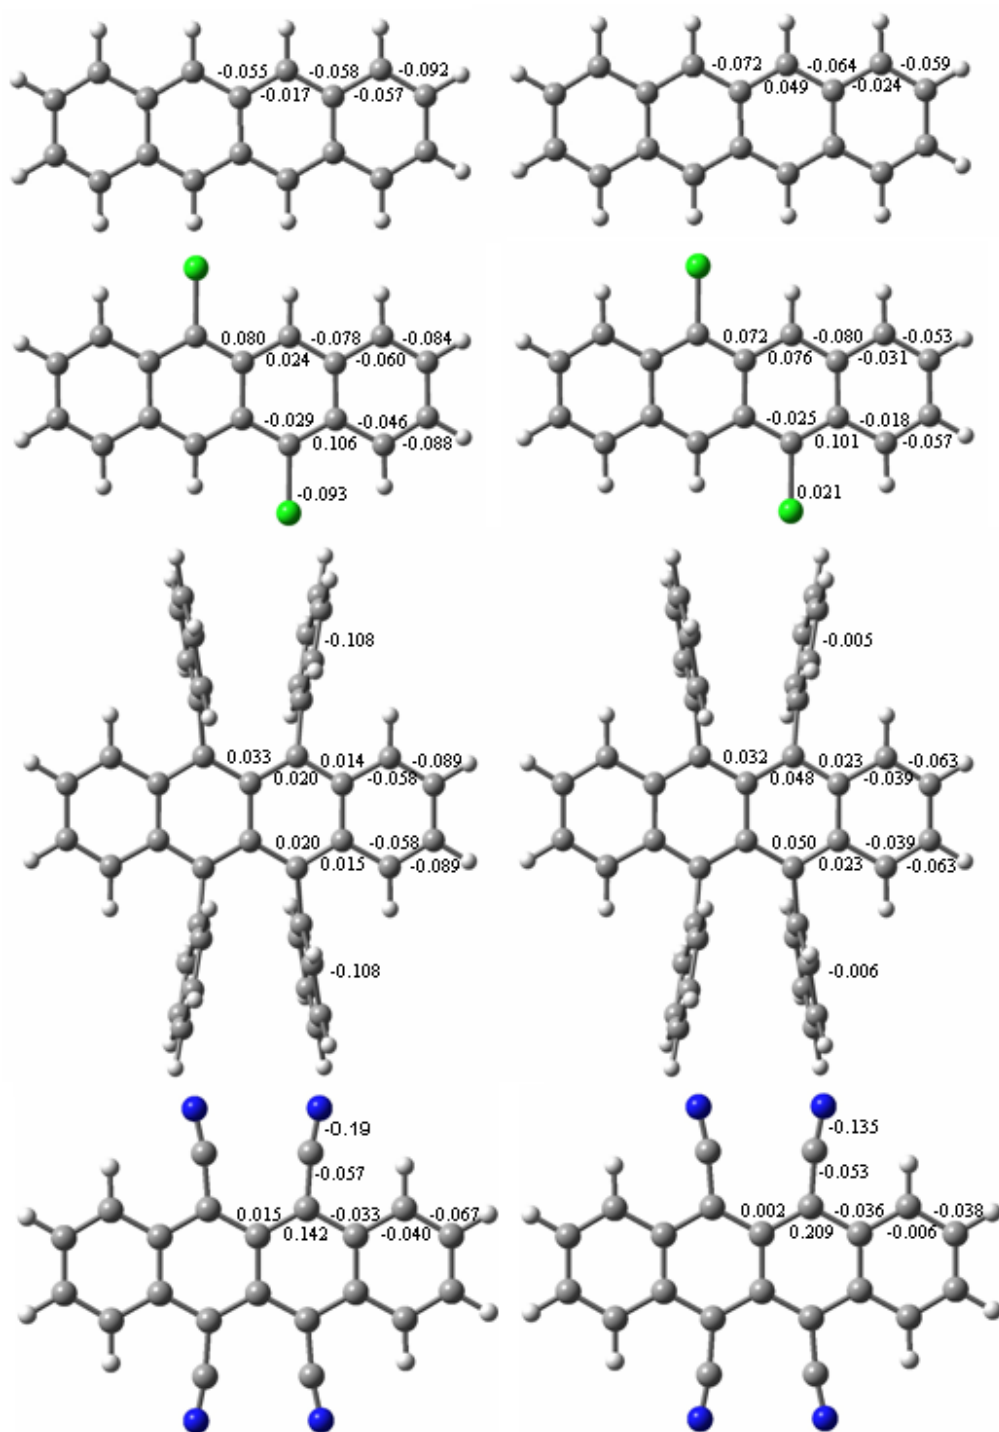

Supplementary Material (ESI) for *PCCP*  
This journal is © the Owner Societies 2010

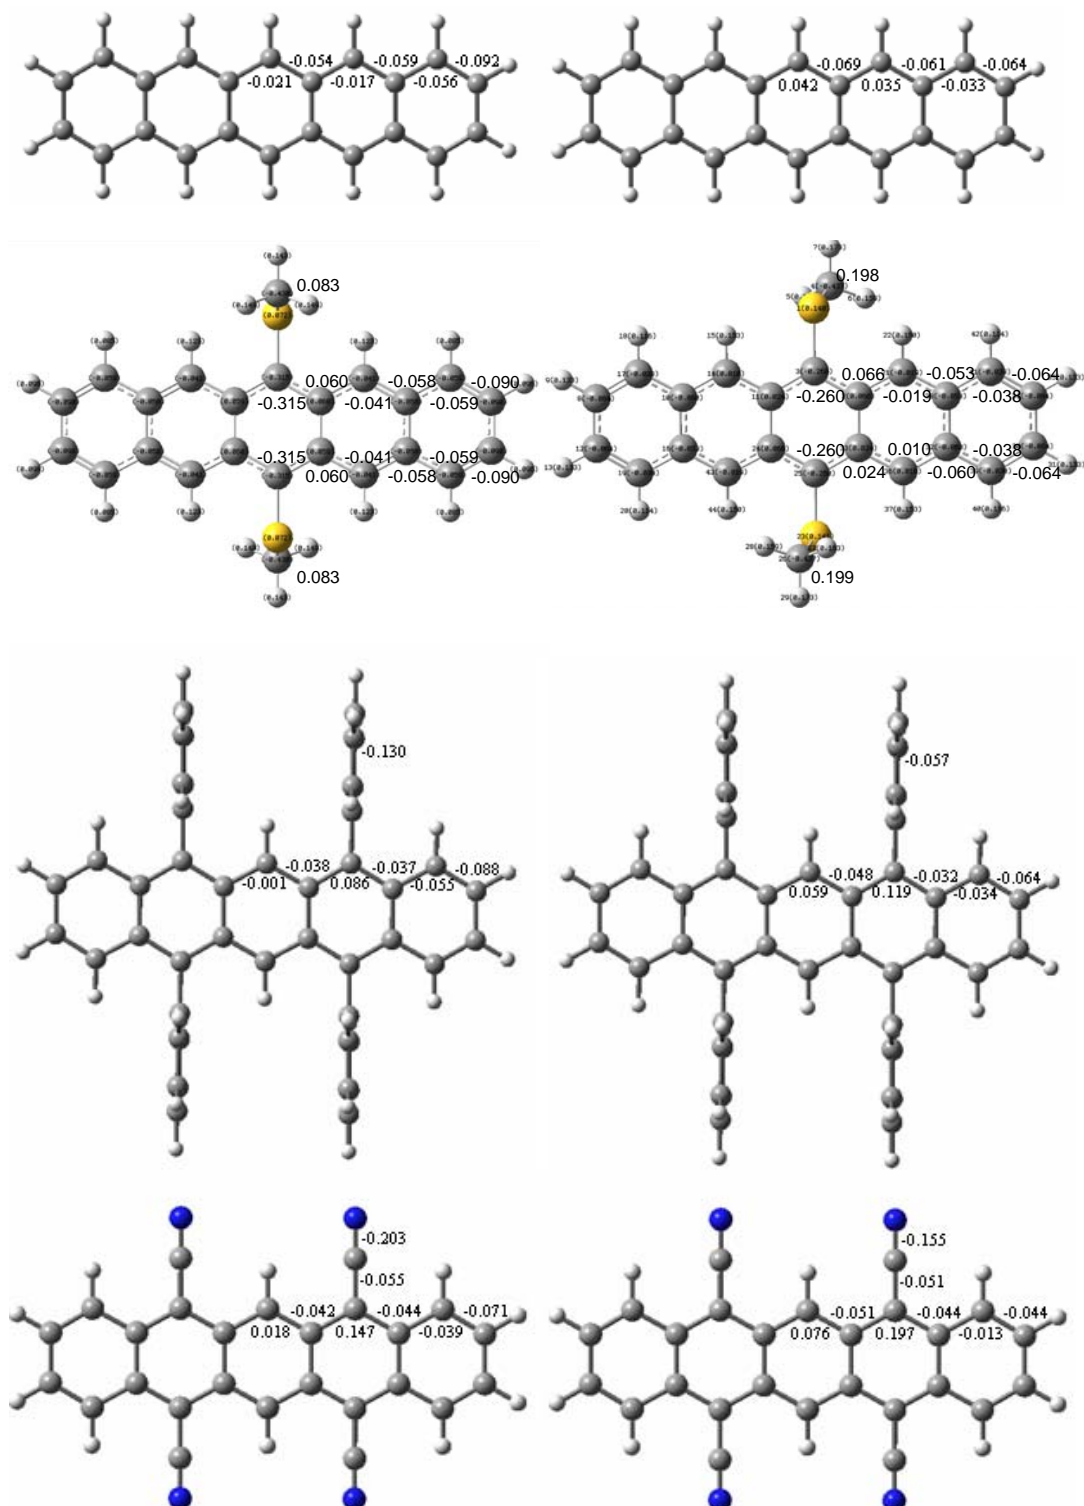

**Table S1.** Computation details of cation internal reorganization energy  $\lambda$ .  $E$  (neutral in neutral geometry),  $E^*$ (neutral in cation geometry),  $E_+$ (cation in cation geometry) and  $E_+^*$  (cation in neutral geometry) are in Hartree, and the IP(ionization potential) and  $\lambda$  are in eV.

|                      | TETR                | DCT                 | RUBR                | TCT         | PENT                | BMP         | TPP         | TCP                 |
|----------------------|---------------------|---------------------|---------------------|-------------|---------------------|-------------|-------------|---------------------|
| $E$<br>(hartree)     | -693.32294          | -1612.55922         | -1617.69733         | -1062.34506 | -846.98952          | -1722.05239 | -1771.40103 | -1216.03824         |
| $E^*$<br>(hartree)   | -693.32083          | -1612.55654         | -1617.69449         | -1062.34365 | -846.98775          | -1722.05006 | -1771.39892 | -1216.03691         |
| $E_+$<br>(hartree)   | -693.08380          | -1612.31177         | -1617.47588         | -1062.05731 | -846.76436          | -1721.82566 | -1771.19019 | -1215.76728         |
| $E_+^*$<br>(hartree) | -693.08164          | -1612.30905         | -1617.47309         | -1062.05586 | -846.76255          | -1721.82368 | -1771.18805 | -1215.76593         |
| IP (eV)              | 6.5662              | 6.8075              | 6.1019              | 7.8696      | 6.1762              | 6.1697      | 5.7955      | 7.4100              |
|                      | 6.97 <sup>a</sup>   |                     | 6.41 <sup>a</sup>   |             | 6.63 <sup>a</sup>   |             |             | 7.148 <sup>b</sup>  |
| $\lambda$ (eV)       | 0.1160              | 0.1468              | 0.1531              | 0.0778      | 0.0976              | 0.1172      | 0.1248      | 0.0730              |
|                      | 0.1130 <sup>c</sup> | 0.1410 <sup>b</sup> | 0.1590 <sup>d</sup> |             | 0.0970 <sup>c</sup> |             |             | 0.0690 <sup>b</sup> |

<sup>a</sup> Reference 66. <sup>b</sup> Reference 11. <sup>c</sup> Reference 62. <sup>d</sup> Reference 64.

- (11) Kuo, M. Y.; Chen, H. Y.; Chao, I. *Chem-eur. J.* **2007**, *13*, 4750-4758.  
 (62) Coropceanu, V.; Malagoli, M.; da Silva, D. A.; Gruhn, N. E.; Bill, T. G.; Bredas, J. L. *Phys. Rev. Lett.* **2002**, *89*, 275503  
 (64) D. A. da Silva Filho, E.-G. Kim, J.-L. Brédas, *Adv. Mater.* **2005**, *17*, 1072-1076.  
 (66) Wen, S. H.; Li, A.; Song, J. L.; Deng, W. Q.; Han, K. L.; Goddard, W. A. III *J. Phys. Chem. B* **2009**, *113*, 8813-8819.

**Fig. S2.** HOMO and LUMO of the molecules in Scheme 1.

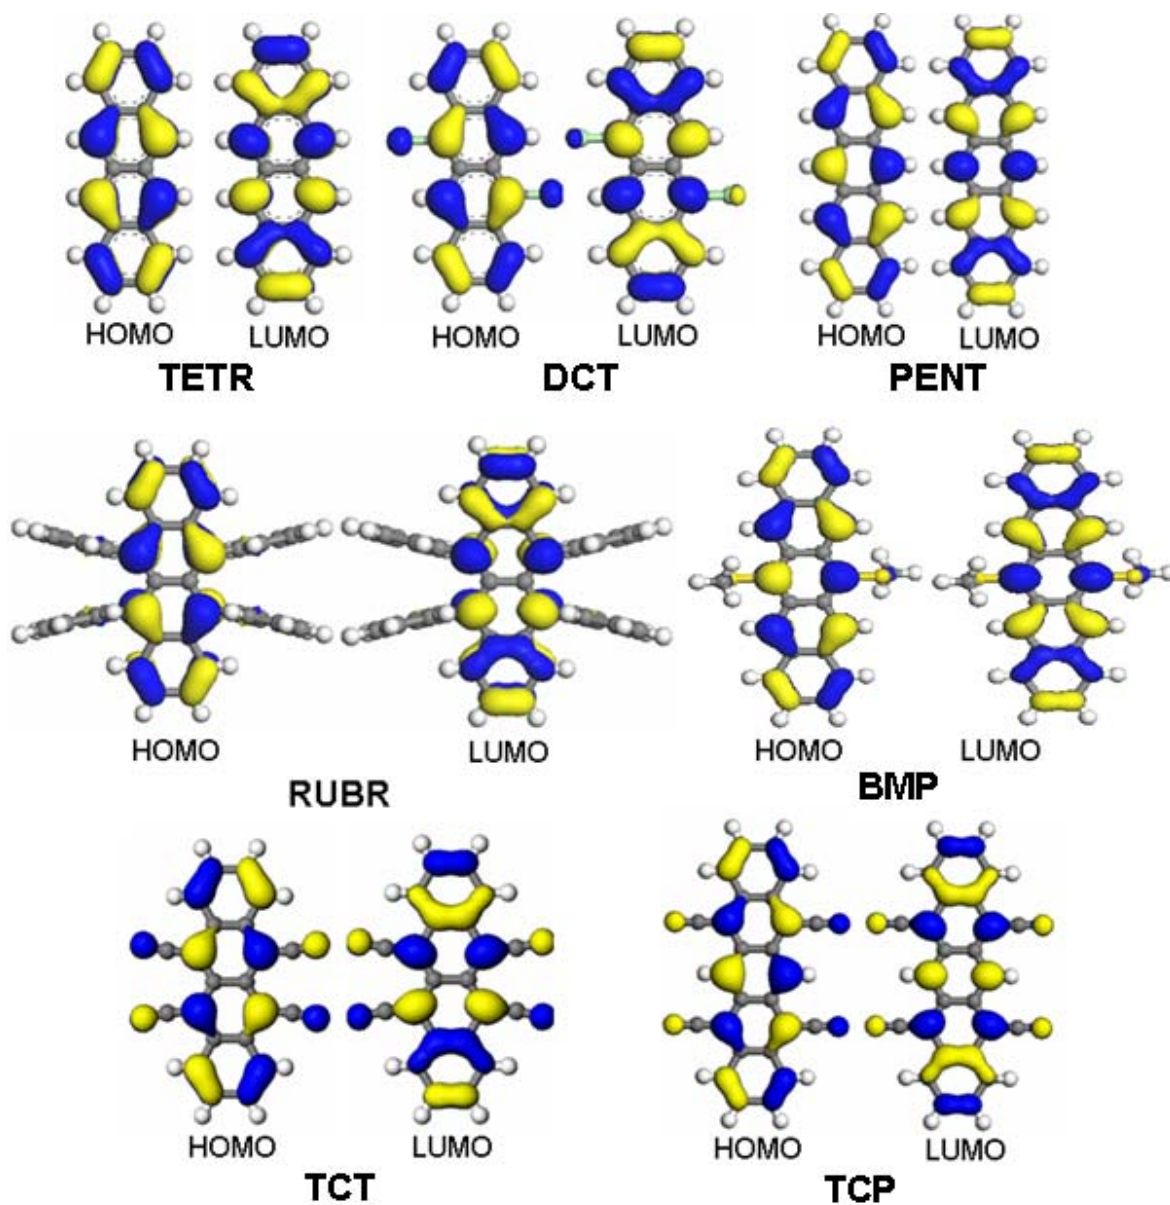

Supplement: b923862j.pdf [file b923862j.pdf]
